# Supplementary material for: Clinical Trial of Lamivudine in Children with Chronic Hepatitis B
Source: Atypon-hosted journal article supplement (doi:10.1056/nejmoa012452), 2002-05-30
Supplement: nejm_jonas_1706sa1.pdf [file nejm_jonas_1706sa1.pdf]

# Supplementary Appendix

This appendix has been provided by the authors to give readers additional information about their work.

Supplement to: Jonas MM, Kelley DA, Mizerski J, et al. Clinical Trial of Lamivudine in Children with Chronic Hepatitis B. *N Engl J Med* 2002;346:1706-13.

**SUPPLEMENTARY APPENDIX 1. CHARACTERISTICS  
OF THE PATIENTS AT BASE LINE.\***

| CHARACTERISTIC                                                                  | PLACEBO<br>GROUP<br>(N=95) | LAMIVUDINE<br>GROUP<br>(N=191) |
|---------------------------------------------------------------------------------|----------------------------|--------------------------------|
| Age — yr                                                                        |                            |                                |
| Mean                                                                            | 8                          | 9                              |
| Range                                                                           | 2–17                       | 1–17                           |
| Sex — no. (%)                                                                   |                            |                                |
| Female                                                                          | 34 (36)                    | 68 (36)                        |
| Male                                                                            | 61 (64)                    | 123 (64)                       |
| Height                                                                          |                            |                                |
| Median — cm                                                                     | 131                        | 135                            |
| Range — cm                                                                      | 82–186                     | 86–188                         |
| Height-for-age z score                                                          | –0.29                      | –0.09                          |
| Weight                                                                          |                            |                                |
| Median — kg                                                                     | 30                         | 32                             |
| Range — kg                                                                      | 11–80                      | 13–94                          |
| Weight-for-age z score                                                          | –0.19                      | 0.02                           |
| Racial or ethnic origin — no. (%)                                               |                            |                                |
| White                                                                           | 60 (63)                    | 139 (73)                       |
| Asian                                                                           | 22 (23)                    | 33 (17)                        |
| Black                                                                           | 9 (9)                      | 11 (6)                         |
| Hispanic                                                                        | 2 (2)                      | 4 (2)                          |
| Other                                                                           | 2 (2)                      | 4 (2)                          |
| Route of transmission of HBV<br>infection — no. (%)                             |                            |                                |
| Unknown                                                                         | 39 (41)                    | 89 (47)                        |
| Perinatal                                                                       | 36 (38)                    | 61 (32)                        |
| Other†                                                                          | 15 (16)                    | 37 (19)                        |
| Transfusion                                                                     | 5 (5)                      | 3 (2)                          |
| Injection-drug use                                                              | 0                          | 1 (<1)                         |
| Sexual contact                                                                  | 0                          | 0                              |
| HBV DNA — meq/ml                                                                |                            |                                |
| Median                                                                          | 1032                       | 895                            |
| Range                                                                           | 1.7–15,010                 | 2.2–28,300                     |
| Alanine aminotransferase — no. of times<br>the upper limit of the normal range‡ |                            |                                |
| Median                                                                          | 2.3                        | 2.1                            |
| Range                                                                           | 0.3–22.1                   | 0.7–16.9                       |
| Mean                                                                            | 3.2                        | 2.7                            |
| Albumin — g/dl§                                                                 |                            |                                |
| Median                                                                          | 4.2                        | 4.1                            |
| Range                                                                           | 3.3–4.8                    | 3.5–4.9                        |
| Bilirubin — no. of times the upper limit<br>of the normal range¶                |                            |                                |
| Median                                                                          | 0.3                        | 0.3                            |
| Range                                                                           | 0.1–1.4                    | 0.1–4.9                        |
| Prior interferon treatment — no. (%)                                            | 40 (42)                    | 89 (47)                        |

\*There were no significant differences between the groups ( $P \geq 0.11$ ). HBV denotes hepatitis B virus.

†Other routes are routes of horizontal transmission (e.g., family contact, community acquired, and exposure in orphanage).

‡The reference ranges for alanine aminotransferase were 6 to 43 IU per liter for boys and 6 to 34 IU per liter for girls.

§The reference range for albumin was 3.3 to 5.0 g per deciliter.

¶The reference range for bilirubin was 0.2 to 1.2 mg per deciliter.

||One child, who had thalassemia, had an elevated bilirubin level owing to hemolysis.

---

---

**SUPPLEMENTARY APPENDIX 2. ADVERSE EVENTS THAT OCCURRED IN AT LEAST 5 PERCENT OF PATIENTS.**

---

| ADVERSE EVENT                        | PLACEBO         | LAMIVUDINE       |
|--------------------------------------|-----------------|------------------|
|                                      | GROUP<br>(N=96) | GROUP<br>(N=191) |
|                                      | no. (%)         |                  |
| Ear, nose, and throat infections     | 41 (43)         | 47 (25)          |
| Cough                                | 24 (25)         | 29 (15)          |
| Sore throat                          | 21 (22)         | 36 (19)          |
| Fever                                | 18 (19)         | 35 (18)          |
| Headache                             | 17 (18)         | 34 (18)          |
| Abdominal discomfort and pain        | 15 (16)         | 31 (16)          |
| Bronchitis                           | 13 (14)         | 13 (7)           |
| Nausea and vomiting                  | 10 (10)         | 18 (9)           |
| Diarrhea                             | 8 (8)           | 18 (9)           |
| Viral infection                      | 8 (8)           | 11 (6)           |
| Viral infection of respiratory tract | 7 (7)           | 17 (9)           |
| Malaise and fatigue                  | 7 (7)           | 15 (8)           |
| Myalgia                              | 7 (7)           | 13 (7)           |
| Rash                                 | 6 (6)           | 13 (7)           |
| Nasal inflammation                   | 5 (5)           | 11 (6)           |

---
